# Supplementary material
Source: PubMed Central journal article supplement (PMC2663834)
Supplement: ASN.2008080871_1.pdf [file ASN.2008080871_1.pdf]

# Supplemental figure 1

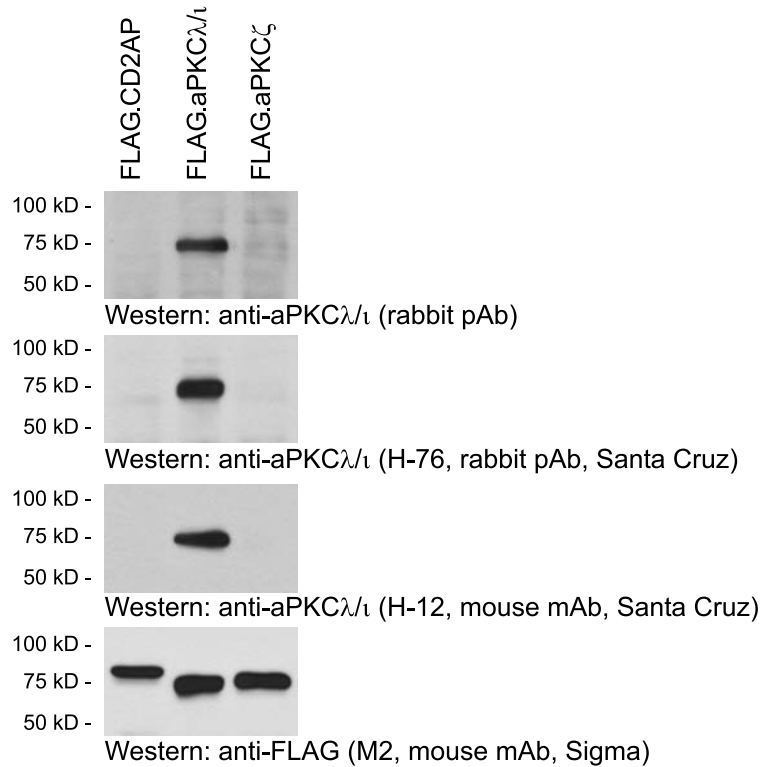

**The used aPKC $\lambda_1$ -antibodies do not cross react with aPKC $\zeta$ .**

HEK 293T cells were transiently transfected with the indicated FLAG-tagged cDNA. Cell lysates were separated by SDS-PAGE, transferred to PVDF-membrane and stained with the aPKC $\lambda_1$ -antibodies used in this study. No cross reaction with aPKC $\zeta$  could be detected.
